# Supplementary material for: Ecotoxicological study of bio-based deep eutectic solvents formed by glycerol derivatives in two aquatic biomodels
Source: Royal Society of Chemistry journal article supplement (doi:10.1039/d2gc01293f), 2022-01-01
Supplement: d2gc01293f1.pdf [file d2gc01293f1.pdf]

## Supplementary Information

Table S1. Ordinary one-way multiple comparisons ANOVA test with a single pooled variance for studied DES in *A. fischeri*.

| <i>p</i> values in <i>A. fischeri</i> |           |           |           |           |           |           |           |           |           |           |           |            |            |           |
|---------------------------------------|-----------|-----------|-----------|-----------|-----------|-----------|-----------|-----------|-----------|-----------|-----------|------------|------------|-----------|
|                                       | ChCl-000  | ChCl-100  | ChCl-200  | ChCl-300  | ChCl-3F00 | ChCl-3i00 | ChCl-400  | N00Cl-000 | N00Cl-100 | N00Cl-200 | N00Cl-300 | N00Cl-3F00 | N00Cl-3i00 | N00Cl-400 |
| <b>ChCl-000</b>                       | -         | -         | -         | -         | -         | -         | -         | -         | -         | -         | -         | -          | -          | -         |
| <b>ChCl-100</b>                       | p< 0.0001 | -         | -         | -         | -         | -         | -         | -         | -         | -         | -         | -          | -          | -         |
| <b>ChCl-200</b>                       | p< 0.0001 | p< 0.0001 | -         | -         | -         | -         | -         | -         | -         | -         | -         | -          | -          | -         |
| <b>ChCl-300</b>                       | p< 0.0001 | p< 0.0001 | p= 0.0915 | p= 0.0672 | -         | -         | -         | -         | -         | -         | -         | -          | -          | -         |
| <b>ChCl-3F00</b>                      | p< 0.0001 | p< 0.0001 | p< 0.0001 | p> 0.9999 | p= 0.1294 | -         | -         | -         | -         | -         | -         | -          | -          | -         |
| <b>ChCl-3i00</b>                      | p< 0.0001 | p< 0.0001 | p< 0.0001 | p= 0.9703 | p= 0.0015 | p= 0.6236 | -         | -         | -         | -         | -         | -          | -          | -         |
| <b>ChCl-400</b>                       | p< 0.0001 | p= 0.0215 | p< 0.0001 | -         | -         | -         | -         | -          | -          | -         |
| <b>N00Cl-000</b>                      | p< 0.0001 | p= 0.1960 | -         | -         | -         | -          | -          | -         |
| <b>N00Cl-100</b>                      | p< 0.0001 | p< 0.0001 | p< 0.0001 | p= 0.9999 | p= 0.1735 | p> 0.9999 | p= 0.5368 | p< 0.0001 | p< 0.0001 | -         | -         | -          | -          | -         |
| <b>N00Cl-200</b>                      | p< 0.0001 | p< 0.0001 | p= 0.0099 | p= 0.1691 | p> 0.9999 | p= 0.3222 | p= 0.0039 | p< 0.0001 | p< 0.0001 | p= 0.4107 | -         | -          | -          | -         |
| <b>N00Cl-300</b>                      | p< 0.0001 | p< 0.0001 | p= 0.9673 | p< 0.0001 | p= 0.0002 | -          | -          | -         |
| <b>N00Cl-3F00</b>                     | p< 0.0001 | p< 0.0001 | p= 0.9034 | p= 0.0017 | p= 0.8960 | p= 0.0024 | p< 0.0001 | p< 0.0001 | p< 0.0001 | p= 0.0035 | p= 0.4105 | p= 0.1562  | -          | -         |
| <b>N00Cl-3i00</b>                     | p< 0.0001 | p< 0.0001 | p< 0.0001 | p> 0.9999 | p= 0.0060 | p= 0.9816 | p= 0.9985 | p< 0.0001 | p< 0.0001 | p= 0.9580 | p= 0.0165 | p< 0.0001  | p< 0.0001  | -         |

## Solvatochromic parameters of glycerol derived DES

Table S2: Solvatochromic parameters of glycerol derived DES

| ChCl:DES         | N00Cl:DES |      |                   |      |      |
|------------------|-----------|------|-------------------|------|------|
|                  | $E_T^N$   | $a$  | $E_T^N$           | $a$  |      |
| <b>ChCl:000</b>  | 0.85      | 0.65 | <b>N00Cl:000</b>  | 0.82 | 0.53 |
| <b>ChCl:100</b>  | 0.79      | 0.62 | <b>N00Cl:100</b>  | 0.79 | 0.49 |
| <b>ChCl:200</b>  | 0.78      | 0.58 | <b>N00Cl:200</b>  | 0.78 | 0.47 |
| <b>ChCl:3F00</b> | 0.81      | 0.76 | <b>N00Cl:3F00</b> | 0.81 | 0.68 |
| <b>ChCl:300</b>  | 0.77      | 0.57 | <b>N00Cl:300</b>  | 0.77 | 0.45 |
| <b>ChCl:3i00</b> | 0.76      | 0.55 | <b>N00Cl:3i00</b> | 0.76 | 0.41 |
| <b>ChCl:400</b>  | 0.76      | 0.57 | <b>N00Cl:400</b>  | 0.76 | 0.44 |

For  $E_T^N$  parameter determination, UV spectra was register from 400 to 650 nm for a solution  $7.5 \cdot 10^{-4}M$  of Reichardt betaine in the selected DES.

$E_T^N$  was calculated as

$$ETN = ET(30) - \frac{30.7}{32.4}$$

$$ET(30) = \frac{28591}{\lambda^{max(nm)}}$$

For a parameter determination,  $^{13}C$ -NMR of a 0.5M solution of N,N-dimethylbenzamide in the selected DES was register using d6-DMSO as solvent. Dd between the signal of orto Carbon and the Carbon of carbonyl group was used.

a parameter was calculated as follow:

$$\alpha = 0.356((\delta_{orto} - \delta_{CO}) - 42.42 - 0.53\pi^*)$$

For  $\pi^*$  parameter determination, UV spectra was register from 240 to 400 nm for a solution  $1.2 \cdot 10^{-4}M$  of *p*-nitroanisol in the selected DES.

$\pi^*$  was calculated as follow:

$$\pi^* = 14.57 - 4270/\lambda_{max(nm)}$$

## Plots of log EC50 of N00Cl derived DES vs different properties

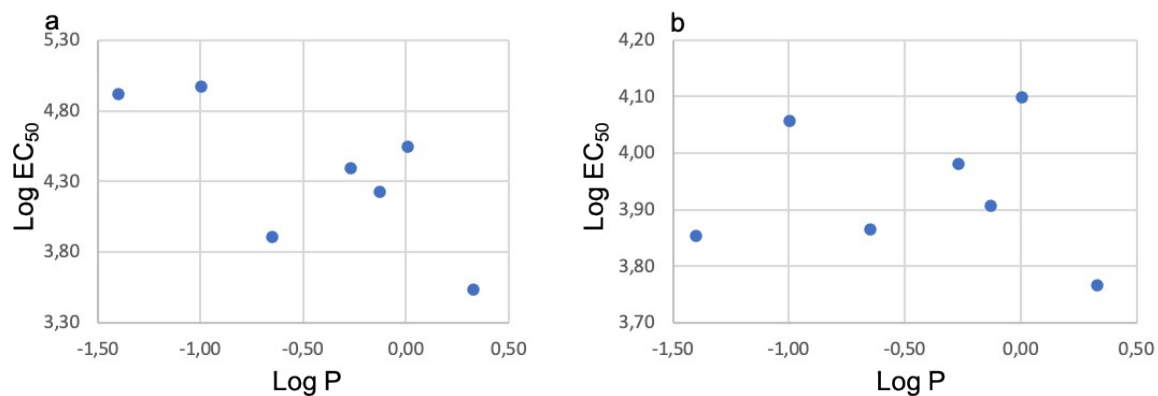

Figure S1: plot of Log EC<sub>50</sub> versus LogP values for N00Cl derived DES. a) *Aliivibrio fischeri*; b) *R. subcapitata*

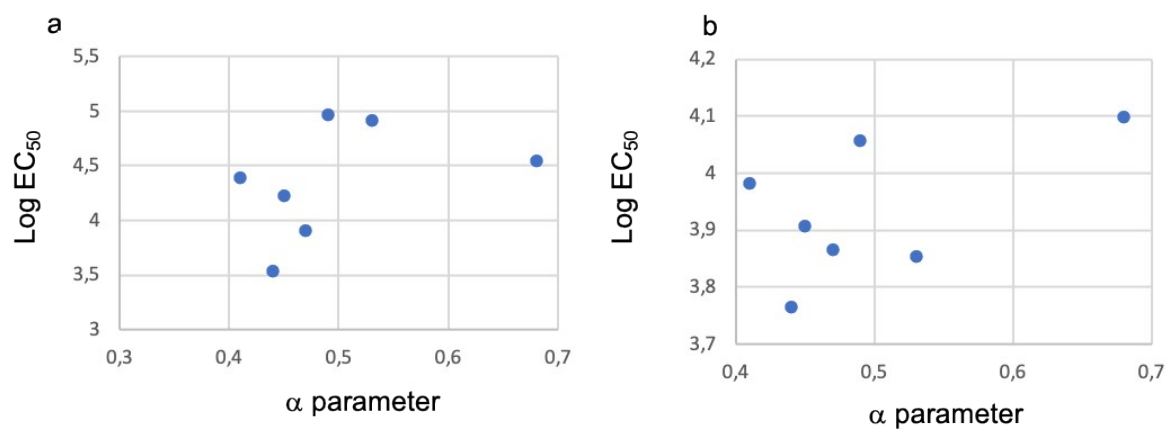

Figure S2: plot of Log EC<sub>50</sub> versus  $\alpha$  parameter values for N00Cl derived DES. a) *Aliivibrio fischeri*; b) *R. subcapitata*

Table S3. Ordinary one-way multiple comparisons ANOVA test with a single pooled variance for studied DES in *R. subcapitata*

|                   | <i>p</i> values in <i>R.subcapitata</i> |           |           |           |           |           |           |           |           |           |           |            |            |           |
|-------------------|-----------------------------------------|-----------|-----------|-----------|-----------|-----------|-----------|-----------|-----------|-----------|-----------|------------|------------|-----------|
|                   | ChCl-000                                | ChCl-100  | ChCl-200  | ChCl-300  | ChCl-3F00 | ChCl-3i00 | ChCl-400  | N00Cl-000 | N00Cl-100 | N00Cl-200 | N00Cl-300 | N00Cl-3F00 | N00Cl-3i00 | N00Cl-400 |
| <b>ChCl:000</b>   | -                                       | -         | -         | -         | -         | -         | -         | -         | -         | -         | -         | -          | -          | -         |
| <b>ChCl:100</b>   | p< 0.0001                               | -         | -         | -         | -         | -         | -         | -         | -         | -         | -         | -          | -          | -         |
| <b>ChCl:200</b>   | p< 0.0001                               | p< 0.0001 | -         | -         | -         | -         | -         | -         | -         | -         | -         | -          | -          | -         |
| <b>ChCl:300</b>   | p< 0.0001                               | p=0.3033  | p< 0.0001 | -         | -         | -         | -         | -         | -         | -         | -         | -          | -          | -         |
| <b>ChCl:3F00</b>  | p< 0.0001                               | p< 0.0001 | p>0.9999  | p< 0.0001 | -         | -         | -         | -         | -         | -         | -         | -          | -          | -         |
| <b>ChCl:3i00</b>  | p< 0.0001                               | p< 0.0001 | p< 0.0001 | p< 0.0001 | p< 0.0001 | -         | -         | -         | -         | -         | -         | -          | -          | -         |
| <b>ChCl:400</b>   | p< 0.0001                               | p< 0.0001 | p< 0.0001 | p< 0.0001 | p< 0.0001 | p< 0.0001 | -         | -         | -         | -         | -         | -          | -          | -         |
| <b>N00Cl:000</b>  | p< 0.0001                               | p< 0.0001 | p< 0.0001 | p< 0.0001 | p< 0.0001 | p=0.0246  | p< 0.0001 | -         | -         | -         | -         | -          | -          | -         |
| <b>N00Cl:100</b>  | p< 0.0001                               | p< 0.0001 | p=0.5183  | p< 0.0001 | p=0.8214  | p< 0.0001 | p=0.5368  | p< 0.0001 | -         | -         | -         | -          | -          | -         |
| <b>N00Cl:200</b>  | p< 0.0001                               | p< 0.0001 | p< 0.0001 | p< 0.0001 | p< 0.0001 | p=0.0771  | p=0.0039  | p>0,9999  | p< 0.0001 | -         | -         | -          | -          | -         |
| <b>N00Cl:300</b>  | p< 0.0001                               | p< 0.0001 | p< 0.0001 | p< 0.0001 | p< 0.0001 | p=0.9526  | p< 0.0001 | p=0.4744  | p< 0.0001 | p=0.7852  | -         | -          | -          | -         |
| <b>N00Cl:3F00</b> | p< 0.0001                               | p< 0.0001 | p>0.9999  | p< 0.0001 | p=0.09968 | p< 0.0001 | p< 0.0001 | p< 0.0001 | p=0.2054  | p< 0.0001 | p< 0.0001 | -          | -          | -         |
| <b>N00Cl:3i00</b> | p< 0.0001                               | p< 0.0001 | p< 0.0001 | p< 0.0001 | p< 0.0001 | p=0.4798  | p=0.9985  | p< 0.0001 | p=0.032   | p=0.0002  | p=0.025   | p< 0.0001  | -          | -         |
| <b>N00Cl:400</b>  | p< 0.0001                               | p< 0.0001 | p< 0.0001 | p< 0.0001 | p< 0.0001 | p< 0.0001 | p=0.2789  | p=0.0763  | p< 0.0001 | p=0.0244  | p=0.0002  | p< 0.0001  | p< 0.0001  | -         |
